# Supplementary material for: In Vitro Antibacterial Properties of Cefiderocol, a Novel Siderophore Cephalosporin, against Gram-Negative Bacteria
Source: PubMed Central journal article supplement (PMC5740388; doi:10.1128/aac.01454-17), 2017-12-21
Supplement: AAC.01454-17_zac001186779s1.pdf [file AAC.01454-17_zac001186779s1.pdf]

1 **Figure S1. Observation of morphological change in the presence of 1×MIC of cefiderocol or ceftazidime**

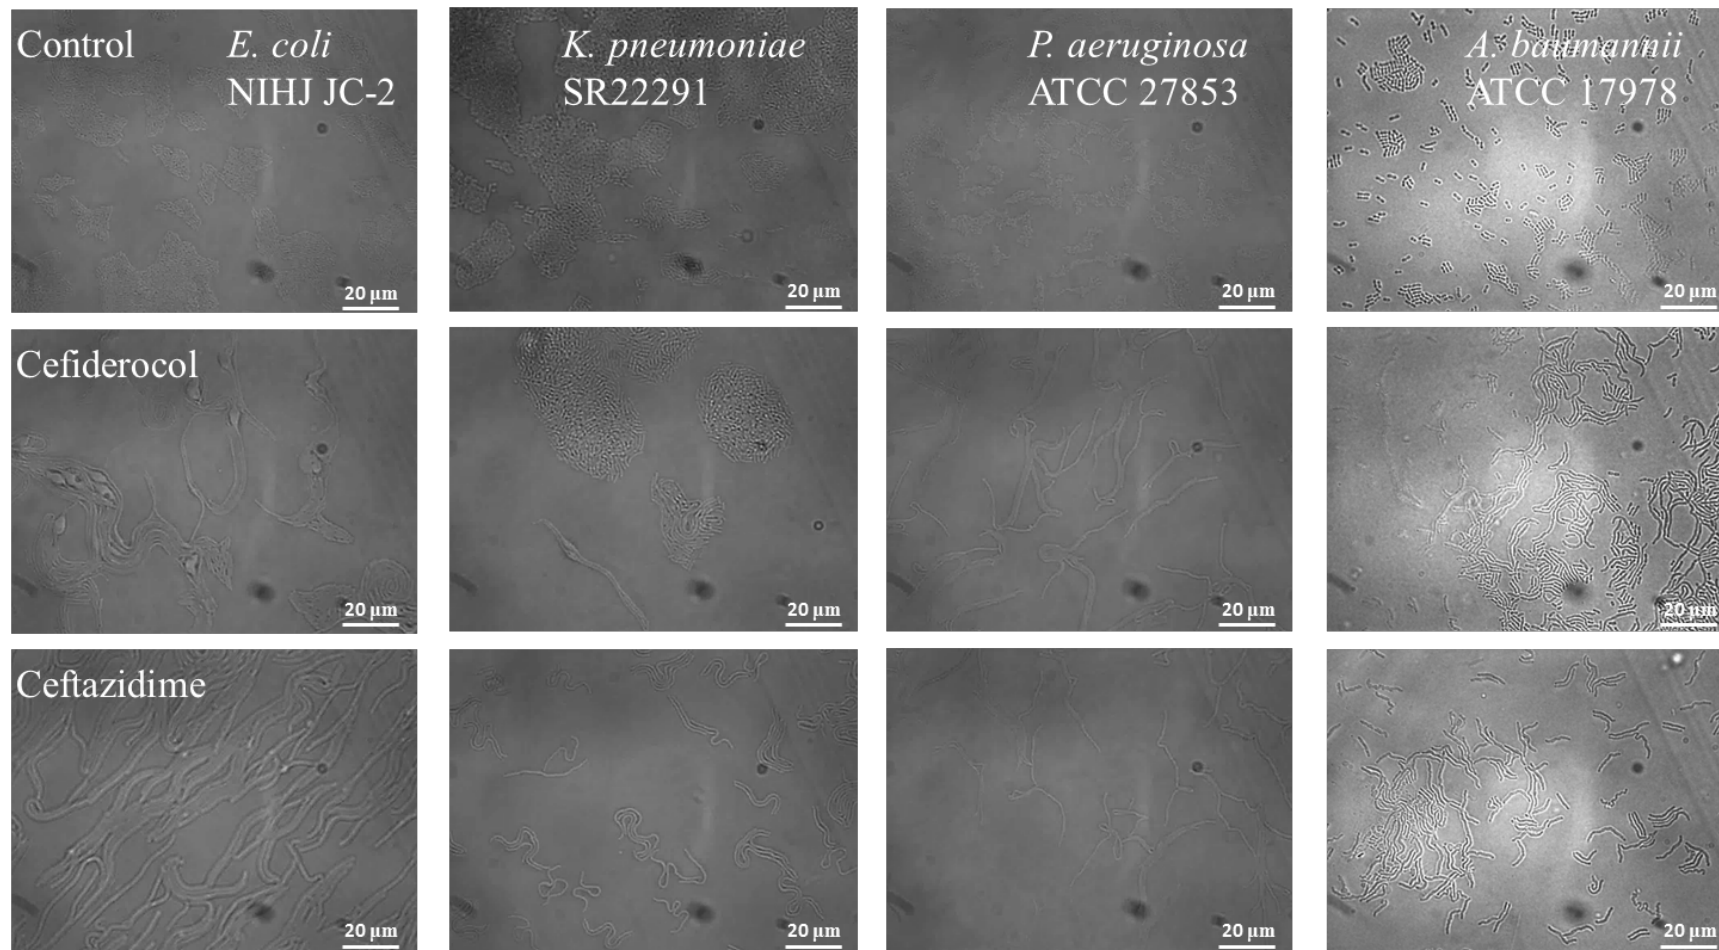

2

3

4 **Figure S2. Observation of morphological change in the presence of 4×MIC of cefiderocol or ceftazidime**

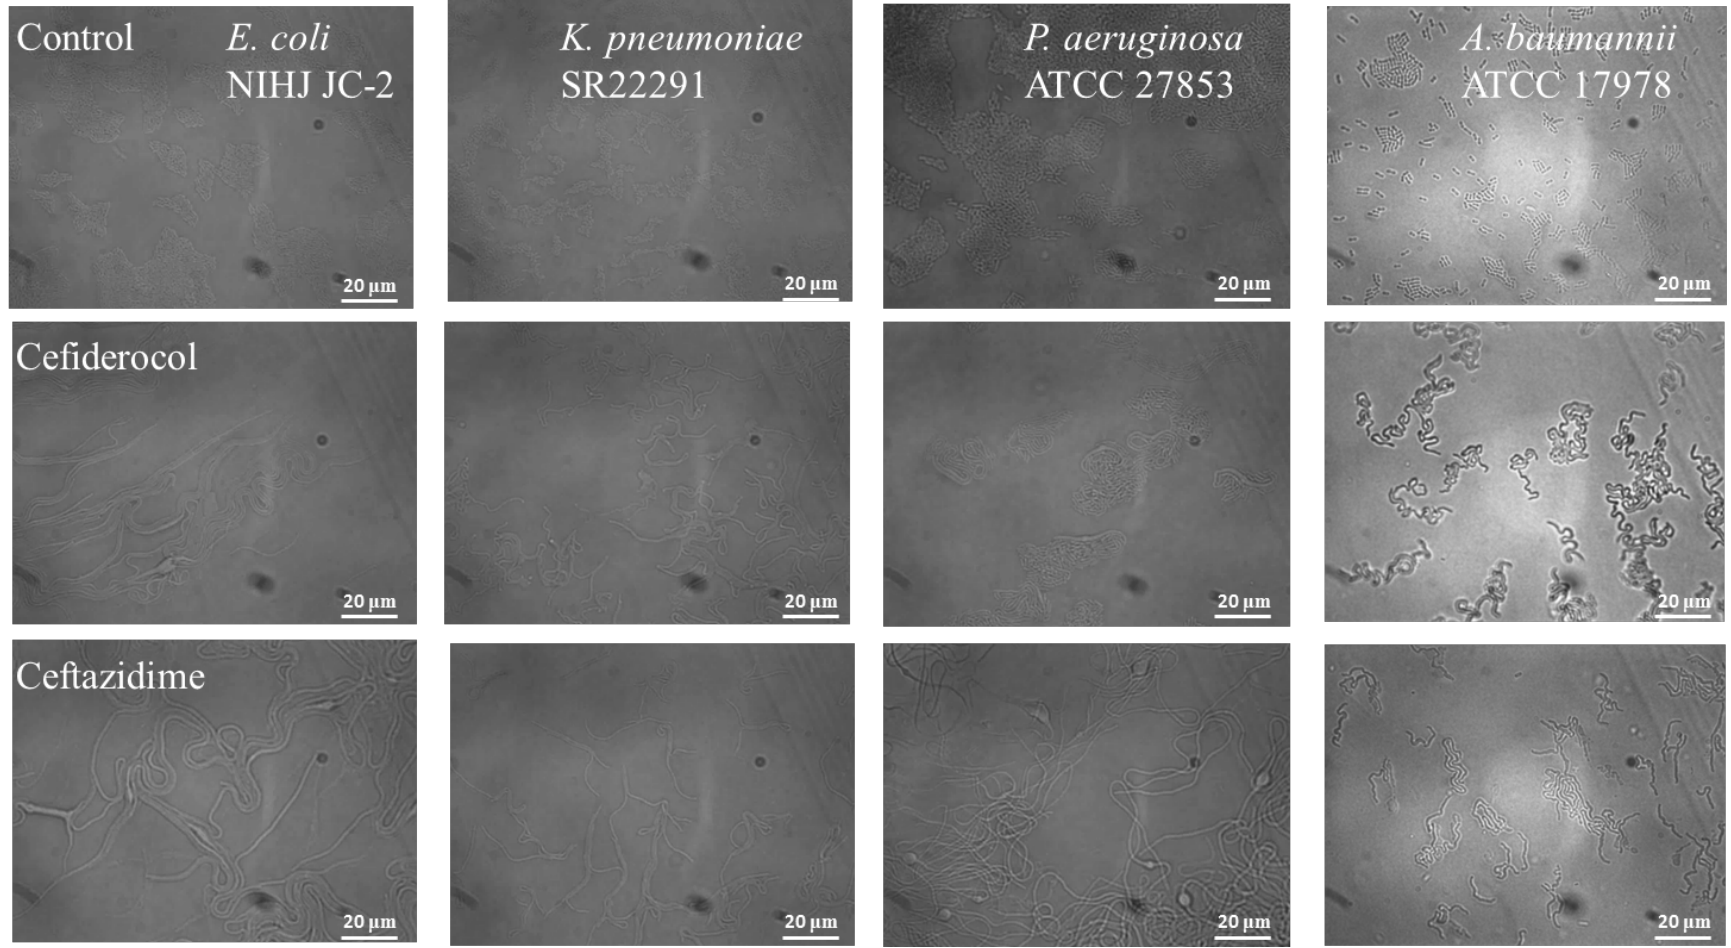

5  
6

7 **Supplemental method 1. Construction of deletion mutant strains**

8 The strain of *P. aeruginosa* SR-L00016 was constructed from PW8599 with the deletion of *pirA* gene following the method described by  
9 Alexeyev et al. and Schweizer et al. (1-2). The *pirA* gene fragment amplified by PCR was cloned into NsiI site of pEX100TG  
10 (pEX100T::Gm<sup>R</sup> cassette from pBSL142), followed by removal of the internal EcoNI fragment on *pirA* gene of the plasmid. *E. coli*  
11 S17-1 was transformed with the resultant plasmid, and the plasmid was transferred to PW8599 by conjugation to make the homologous  
12 recombination on the *pirA* of PW8599. The *pirA* gene deletion was screened and verified by PCR and sequencing.

13 The *PiuA* expression plasmid was constructed using pMMB67HE-Gm (replaced ampicillin-resistant cassette of pMMB67HE with  
14 gentamycin-resistant cassette). The *piuA* gene fragment was amplified by PCR and cloned into pMMB67HE-Gm by using In-Fusion®  
15 HD Cloning Kit (Takara Bio Inc., Shiga, Japan), obtaining pMMB67HE-Gm-*PiuA*. *P. aeruginosa* PW8599 (PAO1 harboring transposon  
16 insertion into *piuA*) was transformed with pMMB67HE-Gm and pMMB67HE-Gm-*PiuA* to obtain the strains of SR-L00197 and  
17 SR-L00252, respectively.

18 The deletion mutant strains of *E. coli* BW25113 were constructed according to the methods described by Datsenko et al (3). Briefly, a  
19 FLT-flanked kanamycin marker was amplified and transformed into strain expressing λ Red recombinase with pKD46.  
20 Kanamycin-resistant transformant was selected, and kanamycin cassette was eliminated using FLP expression plasmid pCP20.

21

| Purpose                 | Primers (forward/reverse)                                                                                                                                     |
|-------------------------|---------------------------------------------------------------------------------------------------------------------------------------------------------------|
| Deletion of <i>pirA</i> | 5'-CCAATGCATGCATGCAGCAACTGGTGGACAACAC-3'<br>5'-CACCGCAATATCCGGTCATGCATGCCGATTC-3'                                                                             |
| Cloning of <i>piuA</i>  | 5'-GGAAACAGAATTAAGCTATGTTCGCGTCAGTCCACGGATAC-3'<br>5'-TCGACCTGCAGGCATGCAAGCTTCAGAAGTGGAAGTTCACCCCGAGC-3'                                                      |
| Deletion of <i>cirA</i> | 5'-GAGCGATAACCCATTTTATTTTCGTAGTTACCTCATGGAGATATGGAATGATTCCGGGGATCCGTCGACC-3'<br>5'-GTCCGCCCCGGTTCGCCGGGCATCTTCTCATCAGAAGCGATAATCCACTGCTGTAGGCTGGAGCTGCTTCG-3' |

Deletion of *fiu*

5'-CTCGTGGCAGTGAAAATTTCAACATATAAGAAAAAGTCACCTGCAAAATGATTCCGGGGATCCGTCGACC-3'

5'-AAAAGTGGGGCCTGCGCCCCACATCTGAATCAGAAATGCATATTGGCTGTTGTAGGCTGGAGCTGCTTCG-3'

23 **Supplemental method 2. MIC conditions that are used for some species**

24 CAMHB supplemented with 2.5 to 5.0% of lysed horse blood (LHB) were used and cultured in ambient atmosphere for *B. parapertussis*,  
25 *Streptococcus pneumoniae*, and *Streptococcus pyogenes*, in microaerophilic atmosphere for *Campylobacter jejuni*, and in 5% CO<sub>2</sub>  
26 atmosphere for *Neisseria meningitidis* and *Lactobacillus casei*. MIC against *Haemophilus* spp. was determined in Haemophilus Test  
27 Medium (HTM) broth (Nissui Pharmaceutical Co., Ltd., Tokyo, Japan). MIC against *Neisseria gonorrhoeae* was determined on GC agar  
28 (Hardy Diagnostics, Santa Maria, CA) supplemented with 1% defined growth supplement in 5% CO<sub>2</sub> atmosphere except for meropenem  
29 which was determined on GC agar supplemented with 1% defined growth supplement without cysteine component.  
30 For anaerobic bacteria, Brucella agar (Becton, Dickinson and Company, NJ) supplemented with hemin (Wako Pure Chemical Industries,  
31 Ltd., Osaka, Japan), Vitamin K1 (Wako Pure Chemical Industries, Ltd., Osaka, Japan), and laked sheep blood (Nippon Bio-test  
32 laboratories Inc., Saitama, Japan) was used. For recombinant strains, test medium was supplemented with 10 µg/mL of gentamicin  
33 and/or 0.1 mM of isopropyl β-D-1-thiogalactopyranoside (IPTG) (Wako Pure Chemical Industries) when required.

34

35 **Supplemental method 3. PBP affinity**

36 The affinity of cefiderocol and ceftazidime for PBPs of *E. coli* NHIJ JC-2, *K. pneumoniae* SR22291 and *P. aeruginosa* ATCC 27853  
37 were determined as described by Spratt et al. (Spratt). Briefly, the membrane fraction was incubated with antibiotics, and  
38 benzylpenicillin [benzyl-<sup>14</sup>C] potassium ([<sup>14</sup>C]-PCG, final concentration was 30 to 40 µg/mL) (American Radiolabeled Chemicals, Inc.,  
39 Saint Louis, MO) was added and incubated. Samples were applied to SDS-PAGE to separate PBPs, and the labeled PBPs were detected  
40 and analyzed by STORM (Amersham Bioscience Corp., Buckinghamshire, UK). IC<sub>50</sub>, which was defined as the concentration required  
41 for inhibiting 50% of the binding of [<sup>14</sup>C]-PCG to PBPs, of antibiotic against each PBP was determined using WinNonlin (Pharsight,  
42 CERTARA, CA).

43 The affinity of cefiderocol and ceftazidime for PBPs of *A. baumannii* ATCC 17978 was determined as described by Vashist et  
44 al (Vashist). Briefly, the membrane fraction was incubated with antibiotics, and Bocillin™ FL penicillin sodium salt (Boc-PCV, final  
45 concentration was 100 µg/mL) (Life Technologies, Inc., Carlsbad, CA) was added and incubated. Samples were applied to SDS-PAGE  
46 to separate PBPs, and the florescent density of the labeled PBPs was scanned using an Alexa 555 application of VersaDoc 5000 MP gel  
47 scanner (BIO-RAD) and Quantity One (BIO-RAD). IC<sub>50</sub> of antibiotic was calculated by fitting sigmoidal dose-response model using  
48 XLfit (version 5.3.1.3) (Guildford, Surrey, UK).

49

50 **Supplemental method 4. Observation of morphological change**

51 Morphological changes of *E. coli* NIHJ JC-2, *K. pneumoniae* SR22291, *P. aeruginosa* ATCC 27853, and *A. baumannii* ATCC 17978 in  
52 the presence of 1×MIC or 4×MIC of cefiderocol or ceftazidime. Bacterial suspension in CAMHB was incubated with constant shaking  
53 at 35°C. The log-phase bacterial cells were smeared on compound-containing thin-layer Mueller Hinton agar (MHA; MHB; Becton,  
54 Dickinson and Company, NJ) that was coated on glass slide, and then incubated again at 35°C. Bacterial cells were incubated 4 to 6 h  
55 with or without the concentration corresponding to MIC, and morphological changes of bacterial cells were observed with microscopy  
56 Leica DM2500 (Leica, Germany). The MICs were determined on MHA by agar dilution method, and those against *E. coli* NIHJ JC-2, *K.*  
57 *pneumoniae* SR22291, *P. aeruginosa* ATCC 27853, and *A. baumannii* ATCC 17978 were 0.25, 0.004, 0.25 and 0.25 µg/mL, respectively,  
58 for cefiderocol and 0.25, 0.063, 2 and 4 µg/mL, respectively, for ceftazidime.

59

60 **References**

- 61 **1. Alexeyev MF, Shokolenko IN, Croughan TP.** 1995. Improved antibiotic-resistance gene cassettes and omega elements for  
62 *Escherichia coli* vector construction and *in vitro* deletion/insertion mutagenesis. *Gene*. **160**:63-67.
- 63 **2. Schweizer HP, Hoang TT.** 1995. An improved system for gene replacement and *xylE* fusion analysis in *Pseudomonas aeruginosa*.  
64 *Gene* **158**:15–22.
- 65 **3. Datsenko KA, Wanner BL.** 2000. One-step inactivation of chromosomal genes in *Escherichia coli* K-12 using PCR products. *Proc*  
66 *Natl Acad Sci USA* **97**:6640-6645.
- 67
